# Supplementary material
Source: PubMed Central journal article supplement (PMC7887758)
Supplement: NIHMS1647667-supplement-1.pdf [file NIHMS1647667-supplement-1.pdf]

**Figure S1**

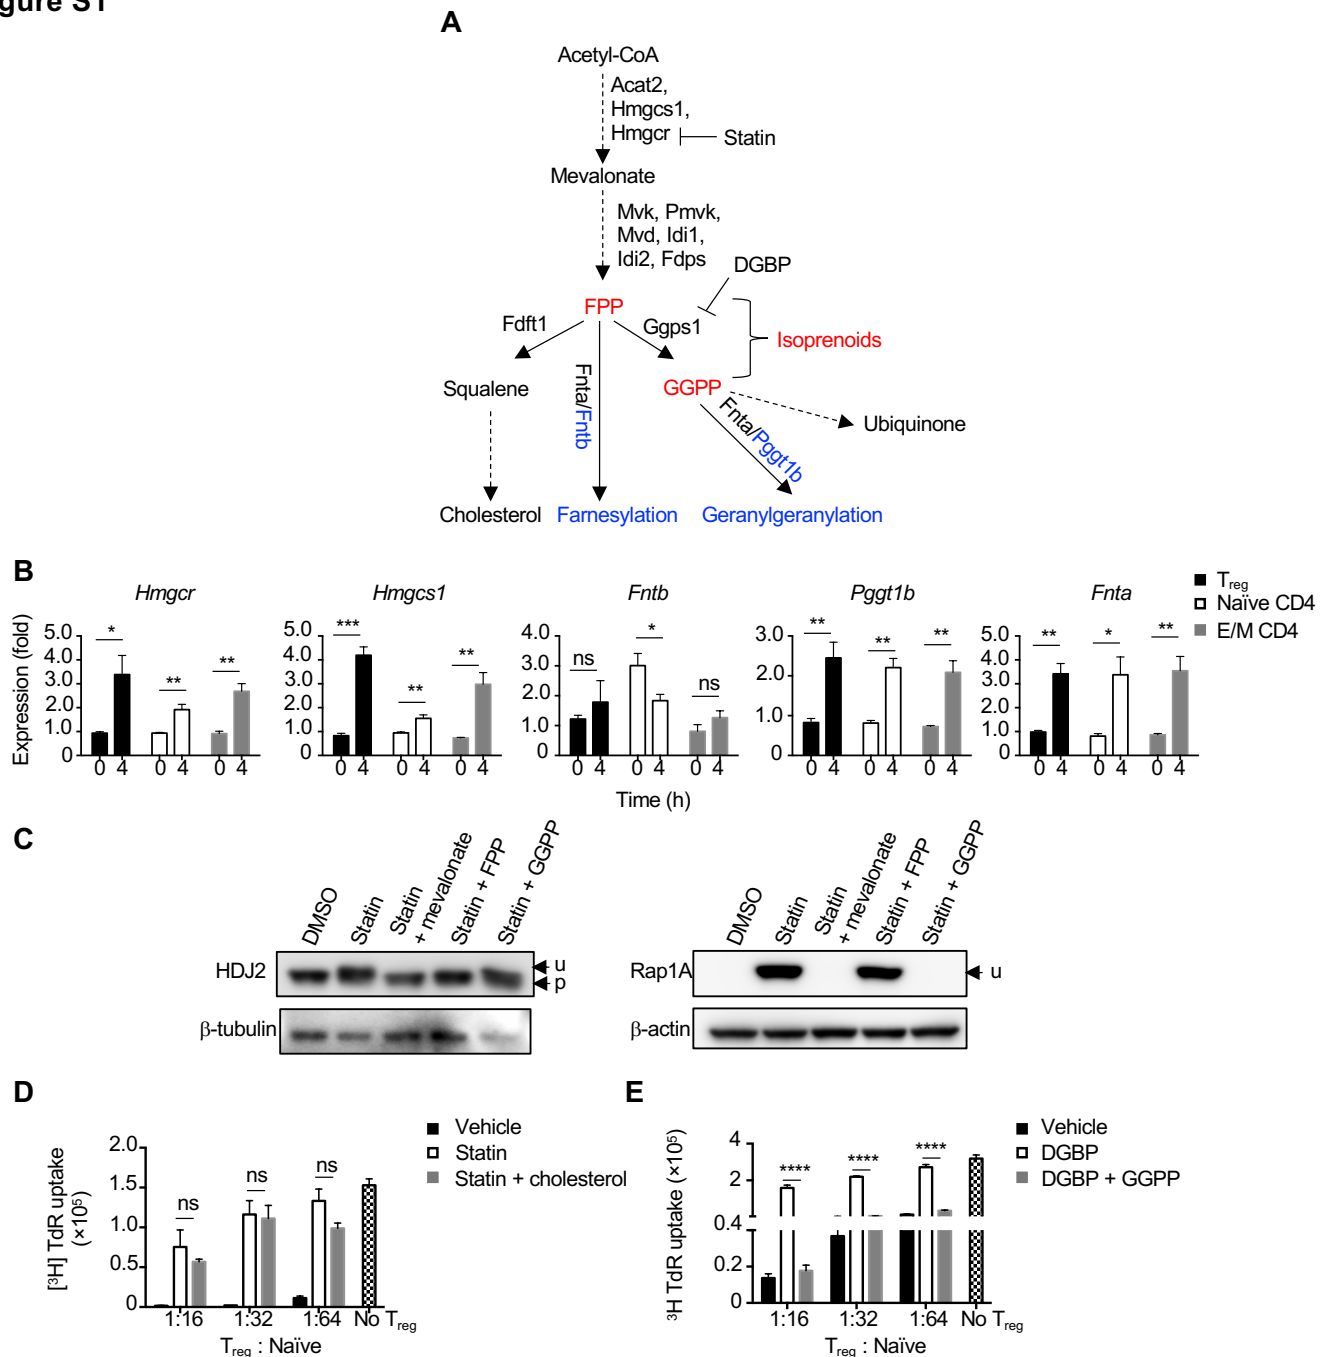

**Figure S1. Upregulation of mevalonate metabolism supports protein prenylation for  $T_{reg}$ -cell suppressive activity. Related to Figure 1**

(A) Schematic of the mevalonate pathway for cholesterol, isoprenoid, and ubiquinone synthesis. (B) Foxp3-YFP<sup>+</sup>  $T_{reg}$  cells, Foxp3-YFP-CD4<sup>+</sup>CD44<sup>lo</sup>CD62L<sup>hi</sup> naive T cells (naive CD4), and Foxp3-YFP-CD4<sup>+</sup>CD44<sup>hi</sup>CD62L<sup>lo</sup> effector/memory T cells (E/M CD4) were isolated from *Foxp3*<sup>Cre-YFP</sup> reporter mice and stimulated with anti-CD3/28 for 0 or 4 h for analysis of indicated gene expression. (C)  $T_{reg}$  cells were treated with simvastatin (statin) with or without the indicated metabolites in the presence of IL-2 for overnight. Immunoblot analysis of unprenylated (u) or prenylated (p) HDJ2 (unprenylated HDJ2 is the upper band) and unprenylated (u) Rap1A (unprenylated Rap1A accumulates in the soluble cell lysate whereas prenylated Rap1A accumulates in the insoluble membrane fraction and is below detection limit).  $\beta$ -tubulin or  $\beta$ -actin was used as a loading control. (D and E)  $T_{reg}$  cells activated *in vitro* by anti-CD3/28 plus IL-2 for 3 days in the presence of DMSO or simvastatin supplemented with or without 5  $\mu$ g/ml cholesterol (D) or in the presence of DMSO or 25  $\mu$ M DGBP supplemented without or with 5  $\mu$ M GGPP, followed by co-culture with conventional CD4<sup>+</sup> T cells.  $T_{reg}$ -cell suppressive activity was then assessed after 3 days. Data are representative of three (C) or two (D and E), or compiled from two (B) independent experiments, with 4 replicates (2 technical replicates from each independent experiment) (B) or 3 technical replicates per group (D and E). \* $p$  < 0.05, \*\* $p$  < 0.01, \*\*\* $p$  < 0.001, \*\*\*\* $p$  < 0.0001 ns, not significant; two-tailed unpaired Student's *t*-test (B) or one-way ANOVA (D). Data are mean  $\pm$  s.e.m.

**Figure S2**

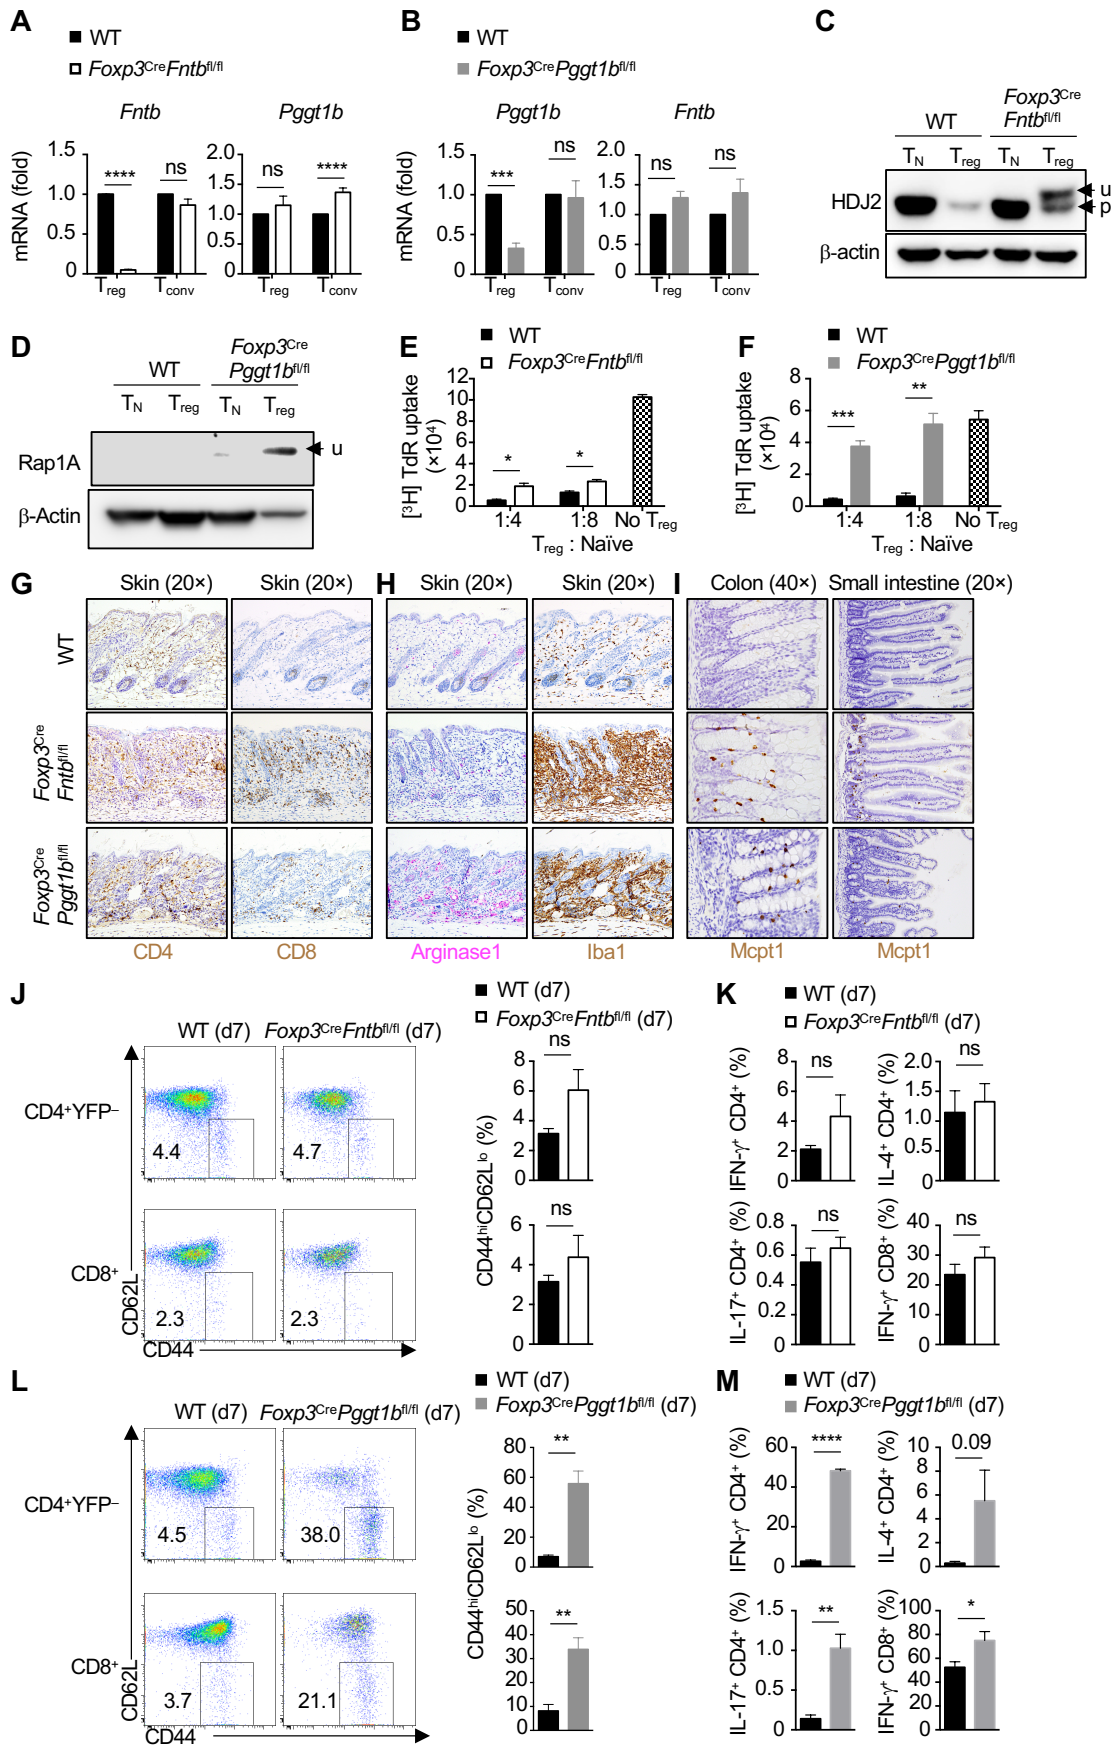

**Figure S2. T<sub>reg</sub> cells require Fntb and Pgg1b for homeostasis. Related to Figure 2.**

(A and B) Quantitative real-time PCR analysis of *Fntb* or *Pggt1b* expression in T<sub>reg</sub> cells or conventional CD4<sup>+</sup> T cells (T<sub>conv</sub>) from WT and *Foxp3<sup>Cre</sup>Fntb<sup>fl/fl</sup>* mice (A) or WT and *Foxp3<sup>Cre</sup>Pggt1b<sup>fl/fl</sup>* mice (B). (C and D) Immunoblot analysis of unphosphorylated (u) or phosphorylated (p) HDJ2 (C) and unphosphorylated (u) Rap1A (D) in naïve CD4<sup>+</sup> T (T<sub>N</sub>) and T<sub>reg</sub> cells isolated from the indicated mice. (E and F) *In vitro* T<sub>reg</sub>-cell suppressive assay by co-culture of T<sub>reg</sub> cells isolated from WT and *Foxp3<sup>Cre</sup>Fntb<sup>fl/fl</sup>* (E) or WT and *Foxp3<sup>Cre</sup>Pggt1b<sup>fl/fl</sup>* (F) mice with naïve CD4<sup>+</sup> T cells. (G–I) Immunohistochemistry analysis of CD4<sup>+</sup> and CD8<sup>+</sup> T cells (G), arginase 1- or Iba1-expressing macrophages (H), or Mcl1-expressing mucosal mast cells (I) in different tissues from indicated mice at 3 weeks. (J and K) Flow cytometry analysis and quantification of CD44<sup>hi</sup>CD62L<sup>lo</sup> CD4<sup>+</sup>Foxp3-YFP<sup>-</sup> (upper) or CD8<sup>+</sup> T cells (lower) (J), or frequency of splenic IFN- $\gamma$ <sup>+</sup>, IL-4<sup>+</sup>, or IL-17<sup>+</sup> CD4<sup>+</sup> and IFN- $\gamma$ <sup>+</sup> CD8<sup>+</sup> T cells (K) in neonatal WT and *Foxp3<sup>Cre</sup>Fntb<sup>fl/fl</sup>* mice at day 7 (d7). (L and M) Flow cytometry analysis and quantification of splenic CD44<sup>hi</sup>CD62L<sup>lo</sup> CD4<sup>+</sup>Foxp3-YFP<sup>-</sup> or CD8<sup>+</sup> T cells (L), or frequency of IFN- $\gamma$ <sup>+</sup>, IL-4<sup>+</sup>, or IL-17<sup>+</sup> CD4<sup>+</sup> and IFN- $\gamma$ <sup>+</sup> CD8<sup>+</sup> T cells (M) in neonatal WT and *Foxp3<sup>Cre</sup>Pggt1b<sup>fl/fl</sup>* mice at d7.

Data are representative of two (C, E) or one (D, F), or compiled from two (A) or three (B, J–M) independent experiments, with 3 (A, B), or 4 (J–M) mice, or 3 technical replicates (E, F) per group. \*p < 0.05, \*\*p < 0.01, \*\*\*p < 0.001, \*\*\*\*p < 0.0001, ns, not significant; two-tailed unpaired Student's *t*-test (A, B, E, F, J–M). Data are mean  $\pm$  s.e.m. Numbers indicate percentage of cells in gates.

**Figure S3**

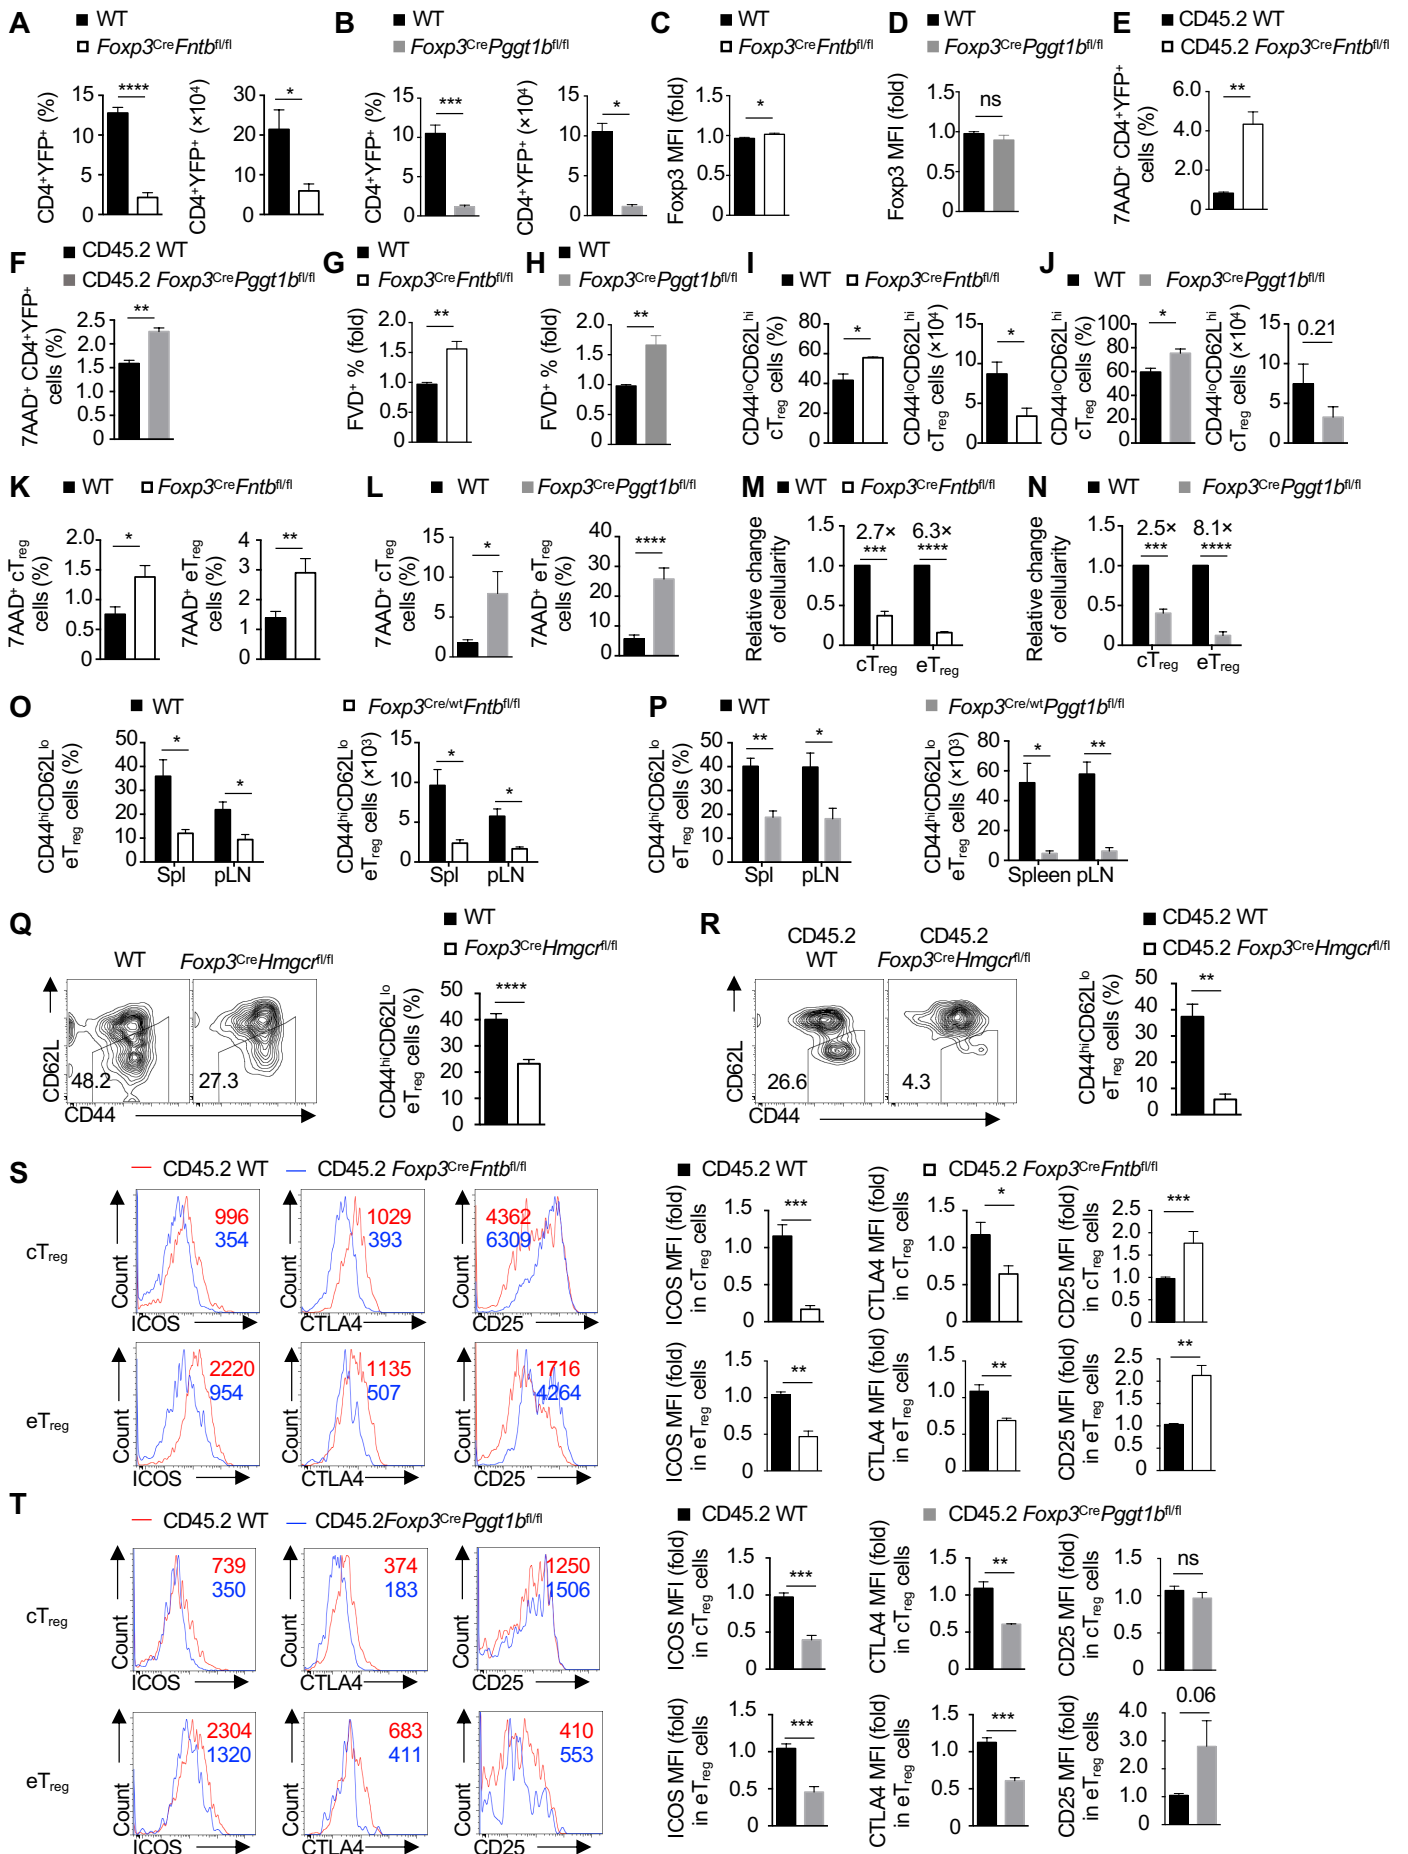

**Figure S3. Deficiency of *Fntb* and *Pggt1b* contributes to severe loss of eT<sub>reg</sub> cells. Related to Figure 3.**

(A and B) Quantification of the frequency and number of splenic Foxp3-YFP<sup>+</sup> T<sub>reg</sub> cells in WT and *Foxp3<sup>Cre</sup>Fntb<sup>fl/fl</sup>* mice (A) or WT and *Foxp3<sup>Cre</sup>Pggt1b<sup>fl/fl</sup>* mice (B). (C and D) Relative mean fluorescence intensity (MFI) of Foxp3 in splenic T<sub>reg</sub> cells from the indicated mice. (E and F) Quantification of frequency of splenic 7AAD<sup>+</sup>CD45.2<sup>+</sup>Foxp3-YFP<sup>+</sup> T<sub>reg</sub> cells from WT and *Foxp3<sup>Cre</sup>Fntb<sup>fl/fl</sup>* (E) or WT and *Foxp3<sup>Cre</sup>Pggt1b<sup>fl/fl</sup>* (F) mixed bone marrow chimeras. (G and H) Quantification of percentage of fixable viability dye (FVD)<sup>+</sup> cells in cT<sub>reg</sub> cells activated by anti-CD3/28 plus IL-2 for 3 days. cT<sub>reg</sub> cells were isolated from the indicated mice. (I and J) Quantification of frequency and number of splenic CD44<sup>lo</sup>CD62L<sup>hi</sup> cT<sub>reg</sub> cells in the indicated mice. (K and L) Quantification of frequency of splenic 7AAD<sup>+</sup> cT<sub>reg</sub> (left) and eT<sub>reg</sub> (right) cells from the indicated mice. (M and N) Quantification of the relative numbers (fold change) of splenic cT<sub>reg</sub> and eT<sub>reg</sub> cells from the indicated mice. WT mice are normalized to 1 for each subset. (O and P) Quantification of frequency and number of eT<sub>reg</sub> cells in WT and *Foxp3<sup>Cre/wt</sup>Fntb<sup>fl/fl</sup>* (O) or WT and *Foxp3<sup>Cre/wt</sup>Pggt1b<sup>fl/fl</sup>* (P) 'mosaic' mice. (Q and R) Flow cytometry analysis and quantification of splenic CD44<sup>hi</sup>CD62L<sup>lo</sup> eT<sub>reg</sub> cells from neonatal WT and *Foxp3<sup>Cre</sup>Hmgcr<sup>fl/fl</sup>* mice (Q) or WT and *Foxp3<sup>Cre</sup>Hmgcr<sup>fl/fl</sup>* mixed bone marrow chimeras (R). (S and T) Flow cytometry analysis and quantification of ICOS, CTLA4, and CD25 expression on splenic CD45.2<sup>+</sup> cT<sub>reg</sub> and eT<sub>reg</sub> cells from indicated mixed bone marrow chimeras. Data are representative of seven (C), three (F) or four (P), or compiled from three (A, D, G–I, M, O, Q, R, T for CD25), two (B, E, J, N, S for ICOS and CTLA4, T for ICOS and CTLA4), or four (K, L, S for CD25) independent experiments, with 3–4 (A, C, I, P), 3 (B, D, F, J), 3 (M, N), 4–6 (E), 4 (E, G–H, O, Q, S for ICOS and CTLA4), 5 (T for CD25), 6 (R, S for ICOS and CTLA4), 5–6 (S for CD25) or 9 (K, L) mice per group. \*p < 0.05, \*\*p < 0.01, \*\*\*p < 0.001, \*\*\*\*p < 0.0001, ns, not significant; two-tailed unpaired Student's *t*-test (A–T). Data are mean ± s.e.m. Controls are normalized to 1 for each comparison (black bars).

**Figure S4**

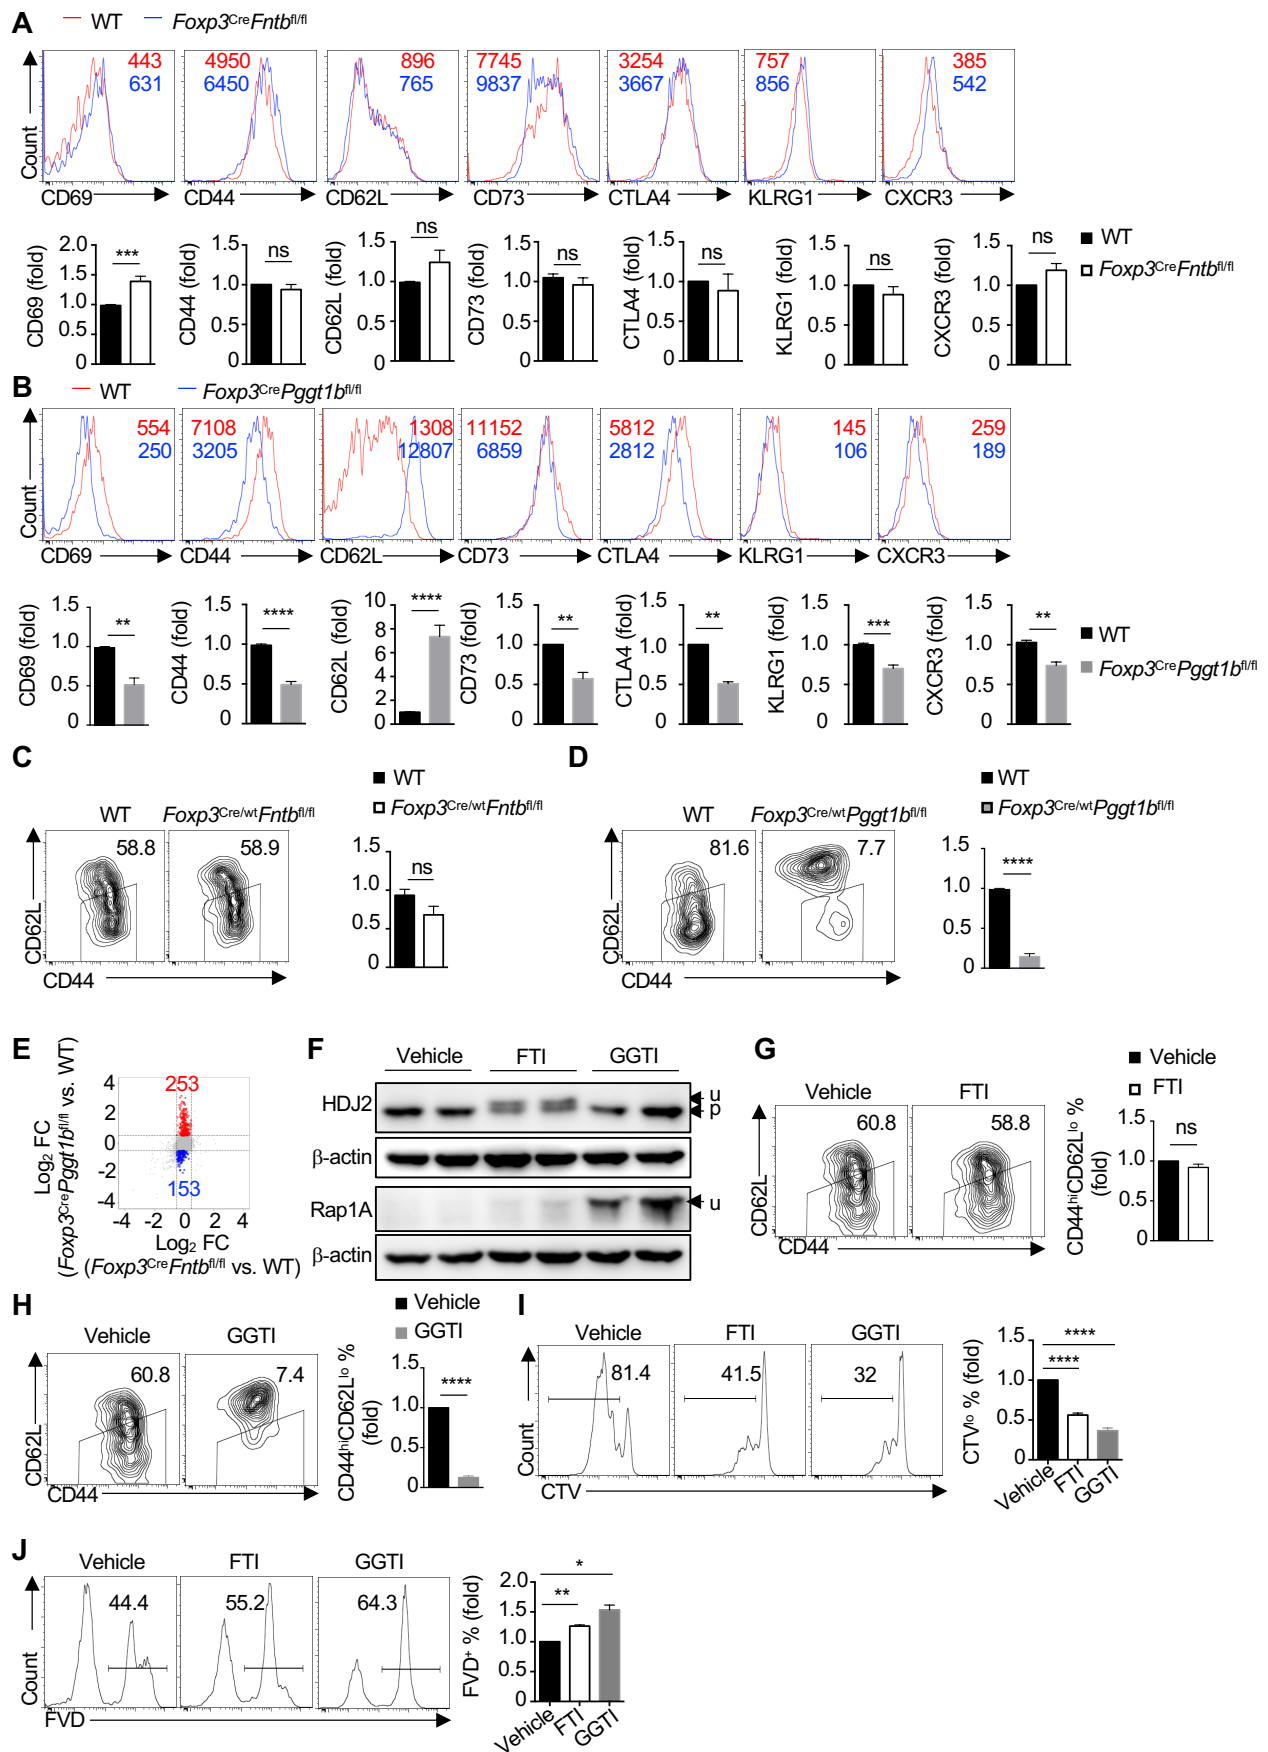

**Figure S4. Farnesylation is dispensable for eT<sub>reg</sub>-cell induction and activation. Related to Figure 4.**

(A and B) Flow cytometry analysis and quantification of expression of CD69, CD44, CD62L, CD73, CTLA4, KLRG1, or CXCR3 on cT<sub>reg</sub> cells isolated from WT or *Foxp3<sup>Cre</sup>Fntb<sup>fl/fl</sup>* mice (A) or WT or *Foxp3<sup>Cre</sup>Pggt1b<sup>fl/fl</sup>* mice (B) and stimulated with anti-CD3/28 plus IL-2 for 3 days. (C and D) Flow cytometry analysis and quantification of eT<sub>reg</sub>-like cell generation in cT<sub>reg</sub> cells isolated from the indicated 'mosaic' mice and stimulated as in (A and B). (E) Fold-change/fold-change analysis of *Pggt1b*-deficient vs. WT compared with *Fntb*-deficient vs. WT T<sub>reg</sub> cells, using CD45.2<sup>+</sup>Foxp3-YFP<sup>+</sup> T<sub>reg</sub> cells from WT and *Foxp3<sup>Cre</sup>Fntb<sup>fl/fl</sup>* or WT and *Foxp3<sup>Cre</sup>Pggt1b<sup>fl/fl</sup>* mixed bone marrow chimeras. Fold-change, FC. (F) Immunoblot analysis of unprenylated (u) or prenylated (p) HDJ2 and unprenylated (u) Rap1A in T<sub>reg</sub> cells treated with DMSO, FTI or GGTI in the presence of IL-2 for overnight. (G and H) Flow cytometry analysis and quantification of the frequency of CD44<sup>hi</sup>CD62L<sup>lo</sup> eT<sub>reg</sub>-like cells. WT cT<sub>reg</sub> cells were stimulated as in (A and B) in the presence of vehicle, FTI (G), or GGTI (H). (I) Flow cytometry analysis and quantification of proliferated (Celltrace Violet (CTV)<sup>lo</sup>) T<sub>reg</sub> cells stimulated as in (A and B) in the presence of FTI or GGTI. (J) Flow cytometry analysis and quantification of apoptotic/dead [fixable viability dye (FVD)<sup>+</sup>] cells in T<sub>reg</sub> cells stimulated as in (A and B) in the presence of FTI or GGTI.

Data are representative of two (F), or compiled from at least two (A–D, I, J) or six (G, H) independent experiments, with 3–8 (A), 3–7 (B), 8 (G, H), 4 (C), or 3 (D, I, J) biological replicates per group. \**p* < 0.05, \*\**p* < 0.01, \*\*\**p* < 0.001, \*\*\*\**p* < 0.0001, ns, not significant; two-tailed unpaired Student's *t*-test (A–D, G, H) or one-way ANOVA (I, J). Data are mean ± s.e.m. Numbers indicate percentage of cells in gates. Numbers in histograms indicate mean fluorescence intensity of proteins or frequency of cells in gates. Controls were normalized to 1 for each comparison (black bars).

**Figure S5**

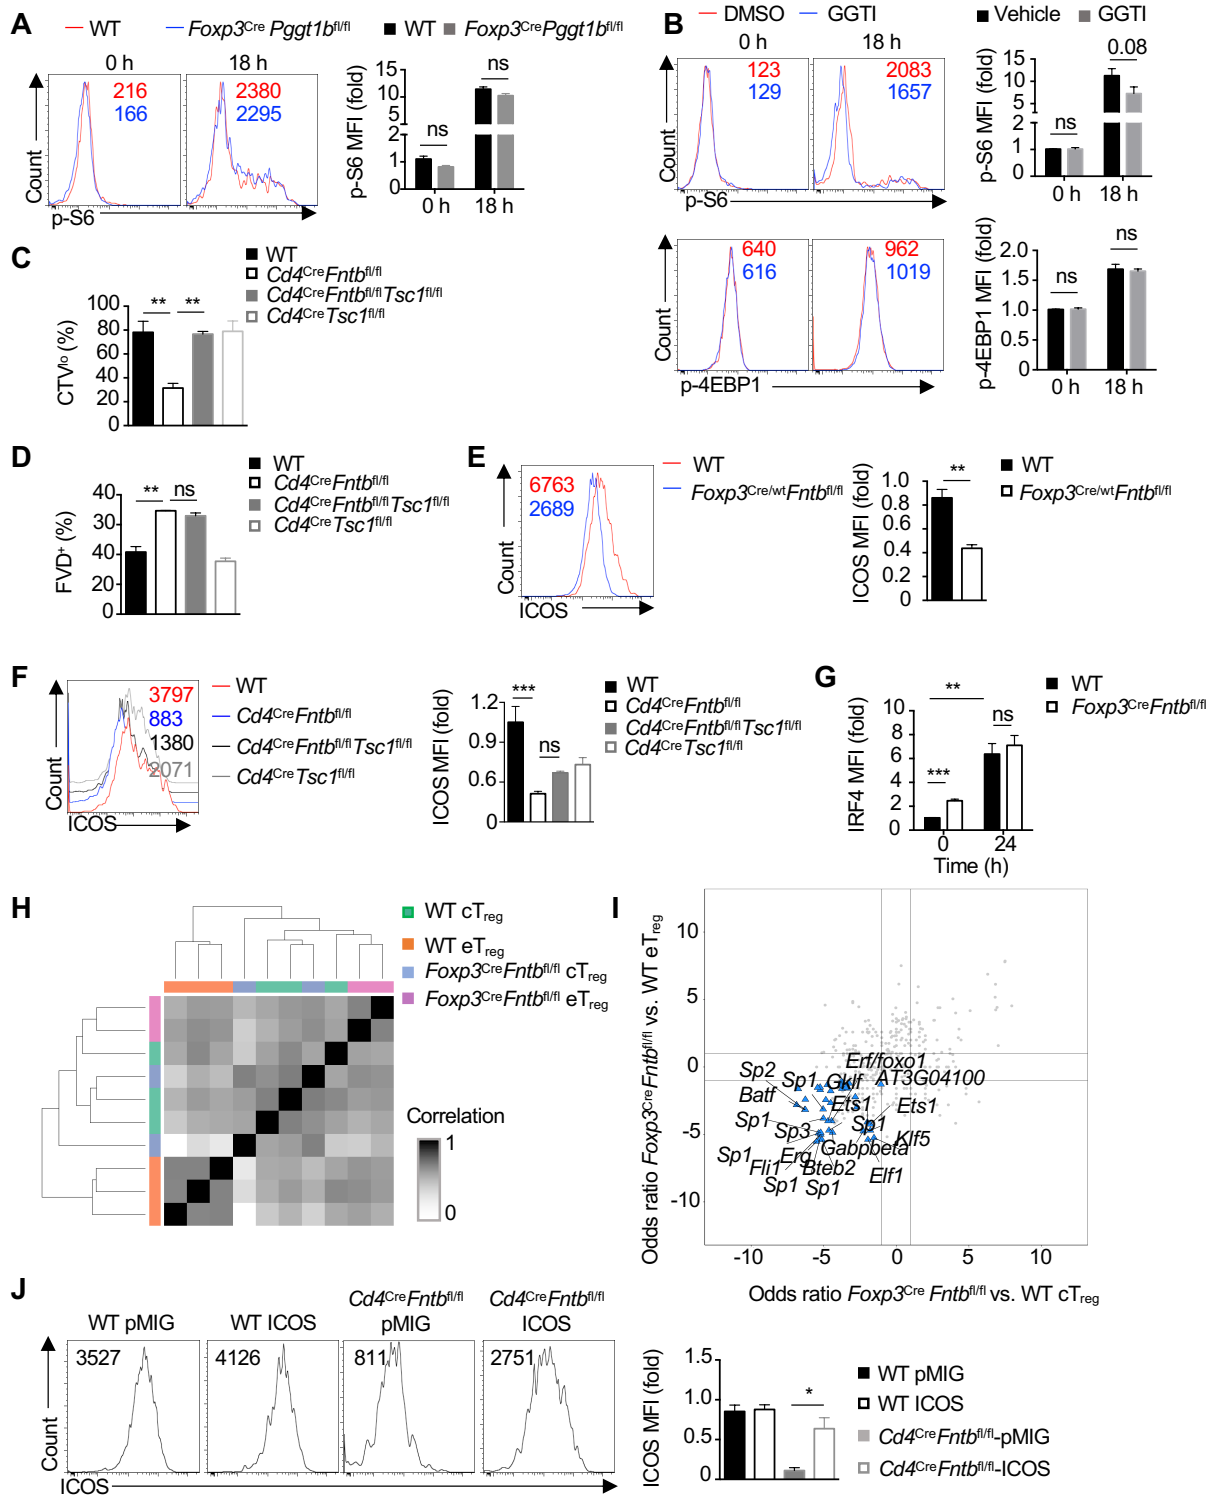



**Figure S5. Pgg1b is not required for the activation of mTORC1 and hyper-activation of mTORC1 signaling restores T<sub>reg</sub>-cell proliferation upon Fntb deletion. Related to Figure 5.**

(A) Flow cytometry analysis and quantification of relative mean fluorescence intensity (MFI) of phosphorylated S6 (p-S6) in cT<sub>reg</sub> cells isolated from WT and *Foxp3<sup>Cre</sup>Pgg1b<sup>fl/fl</sup>* mice and stimulated with anti-CD3/28 plus IL-2 for 18 h. (B) Flow cytometry analysis and quantification of relative p-S6 and p-4EBP1 MFI in WT cT<sub>reg</sub> cells stimulated as in (A) in the presence of vehicle or GGTI. (C and D) cT<sub>reg</sub> cells isolated from WT, *Cd4<sup>Cre</sup>Fntb<sup>fl/fl</sup>*, *Cd4<sup>Cre</sup>Fntb<sup>fl/fl</sup>Tsc1<sup>fl/fl</sup>* or *Cd4<sup>Cre</sup>Tsc1<sup>fl/fl</sup>* mice and stimulated as in (A) for 3 days. Quantification of the percentage of proliferated cells [Celltrace Violet (CTV<sup>lo</sup>); C] or the frequency of apoptotic [fixable live dead (FVD<sup>+</sup>)] cells (D). (E) Flow cytometry analysis and quantification of ICOS expression on cT<sub>reg</sub> cells isolated WT or *Foxp3<sup>Cre/wt</sup>Fntb<sup>fl/fl</sup>* 'mosaic' mice following stimulation as (A) for 3 days. (F) Flow cytometry analysis and quantification of ICOS expression on splenic T<sub>reg</sub> cells from WT, *Cd4<sup>Cre</sup>Fntb<sup>fl/fl</sup>*, *Cd4<sup>Cre</sup>Fntb<sup>fl/fl</sup>Tsc1<sup>fl/fl</sup>* or *Cd4<sup>Cre</sup>Tsc1<sup>fl/fl</sup>* mice. (G) cT<sub>reg</sub> cells isolated from WT or *Foxp3<sup>Cre</sup>Fntb<sup>fl/fl</sup>* mice were stimulated by anti-CD3/28 plus IL-2 for 0 or 24 h. The expression of IRF4 was measured by flow cytometry. (H) Similarity matrix plot of nucleosome-free reads of cT<sub>reg</sub> and eT<sub>reg</sub> cells from WT or *Foxp3<sup>Cre</sup>Fntb<sup>fl/fl</sup>* mixed bone marrow chimeras. (I) Odds ratio/odds ratio plot indicating the predicted downregulated motifs in *Foxp3<sup>Cre</sup>Fntb<sup>fl/fl</sup>* vs. WT eT<sub>reg</sub> cells compared with *Foxp3<sup>Cre</sup>Fntb<sup>fl/fl</sup>* vs. WT cT<sub>reg</sub> cells from mixed bone marrow chimeras. (J) Flow cytometry analysis and quantification of ICOS expression on splenic T<sub>reg</sub> cells in retrogenic mice [WT or *Cd4<sup>Cre</sup>Fntb<sup>fl/fl</sup>* bone marrow cells were transduced with pMIG-GFP empty vector (pMIG) or pMIG-GFP-ICOS (ICOS) retroviral vector; see Methods].

Data are representative of three (G) or compiled from one (A), three (B for p-S6, F, J) or two (B for p-4EBP1, C–E) independent experiments, with 2 (A), 6 (B for p-4EBP1, J for Cre-pMIG and Cre-ICOS), 9 (B for p-S6), 3 (C–F, J for *Cd4<sup>Cre</sup>Fntb<sup>fl/fl</sup>* pMIG) or 4 (G, J for *Cd4<sup>Cre</sup>Fntb<sup>fl/fl</sup>* ICOS) biological replicates per group. \*p < 0.05, \*\*p < 0.01, \*\*\*p < 0.001, ns, not significant; two-tailed unpaired Student's *t*-test (A, B, E, J) or one-way ANOVA (C, D, F, G). Data are mean ± s.e.m. Controls were normalized to 1 for each comparison (black bars).

**Figure S6**

**A** Comparison of *Foxp3<sup>Cre</sup>Pggt1b<sup>fl/fl</sup>* vs WT cT<sub>reg</sub>- and eT<sub>reg</sub>-cell populations. The top transcription factors are filtered using FDR < 0.0001 and log<sub>2</sub>OddsRatio < 1

| Rank in list | Transcription factor name | <i>Foxp3<sup>Cre</sup>Pggt1b<sup>fl/fl</sup></i> vs WT cT <sub>reg</sub> _Fisher_p_val | <i>Foxp3<sup>Cre</sup>Pggt1b<sup>fl/fl</sup></i> vs WT eT <sub>reg</sub> _Fisher_p_val |
|--------------|---------------------------|----------------------------------------------------------------------------------------|----------------------------------------------------------------------------------------|
| 1            | FRA1                      | 1.52E-92                                                                               | < 0.001                                                                                |
| 2            | FOSL1                     | 2.42E-88                                                                               | < 0.001                                                                                |
| 3            | JUN                       | 1.19E-97                                                                               | < 0.001                                                                                |
| 4            | DBX1                      | 1.46E-104                                                                              | < 0.001                                                                                |
| 5            | GCN4                      | 8.41E-107                                                                              | < 0.001                                                                                |
| 6            | AP1                       | 1.51E-95                                                                               | < 0.001                                                                                |
| 7            | JUND                      | 6.07E-89                                                                               | < 0.001                                                                                |
| 8            | ATHB23                    | 1.74E-117                                                                              | < 0.001                                                                                |
| 9            | JUNB                      | 1.93E-75                                                                               | < 0.001                                                                                |
| 10           | JUNBFOSB                  | 6.11E-83                                                                               | < 0.001                                                                                |
| 11           | JUNBFOS                   | 3.03E-92                                                                               | < 0.001                                                                                |
| 12           | JUNDFRA2                  | 4.85E-82                                                                               | < 0.001                                                                                |
| 13           | JUNBFRA1                  | 9.19E-106                                                                              | < 0.001                                                                                |
| 14           | JUNBFRA2                  | 3.05E-86                                                                               | < 0.001                                                                                |
| 15           | FOS                       | 3.84E-87                                                                               | < 0.001                                                                                |
| 16           | FRA2                      | 3.76E-66                                                                               | 2.04E-316                                                                              |
| 17           | JUNFRA2                   | 1.93E-81                                                                               | 6.53E-315                                                                              |
| 18           | JUNDM2                    | 7.50E-66                                                                               | 2.19E-307                                                                              |
| 19           | FOSJUN                    | 3.85E-78                                                                               | 1.15E-301                                                                              |
| 20           | JDP2                      | 3.06E-77                                                                               | 7.87E-291                                                                              |
| 64           | NFKB                      | 8.40E-32                                                                               | 1.73E-77                                                                               |
| 65           | RELA                      | 3.97E-29                                                                               | 3.41E-74                                                                               |
| 67           | NFKB1                     | 2.26E-35                                                                               | 1.05E-69                                                                               |
| 69           | NFKB1                     | 7.43E-11                                                                               | 5.11E-64                                                                               |
| 70           | NFKB1                     | 7.43E-11                                                                               | 5.11E-64                                                                               |
| 71           | NFKAPPAB                  | 2.61E-22                                                                               | 3.18E-62                                                                               |
| 72           | NFKB1                     | 3.09E-28                                                                               | 9.96E-61                                                                               |
| 74           | NFKB                      | 1.02E-21                                                                               | 2.39E-55                                                                               |
| 94           | RELA                      | 8.00E-16                                                                               | 2.44E-27                                                                               |
| 104          | NFKB                      | 7.90E-09                                                                               | 5.21E-22                                                                               |
| 122          | CREL                      | 1.32E-22                                                                               | 1.77E-13                                                                               |
| 146          | NFATC1                    | 0.62499662                                                                             | 4.07E-09                                                                               |
| 174          | CREL                      | 1.77E-13                                                                               | 2.98E-06                                                                               |
| 192          | RELA                      | 1.45E-10                                                                               | 2.10E-05                                                                               |

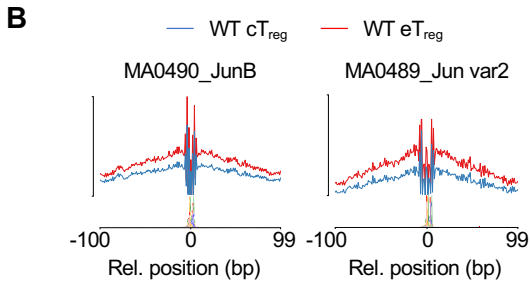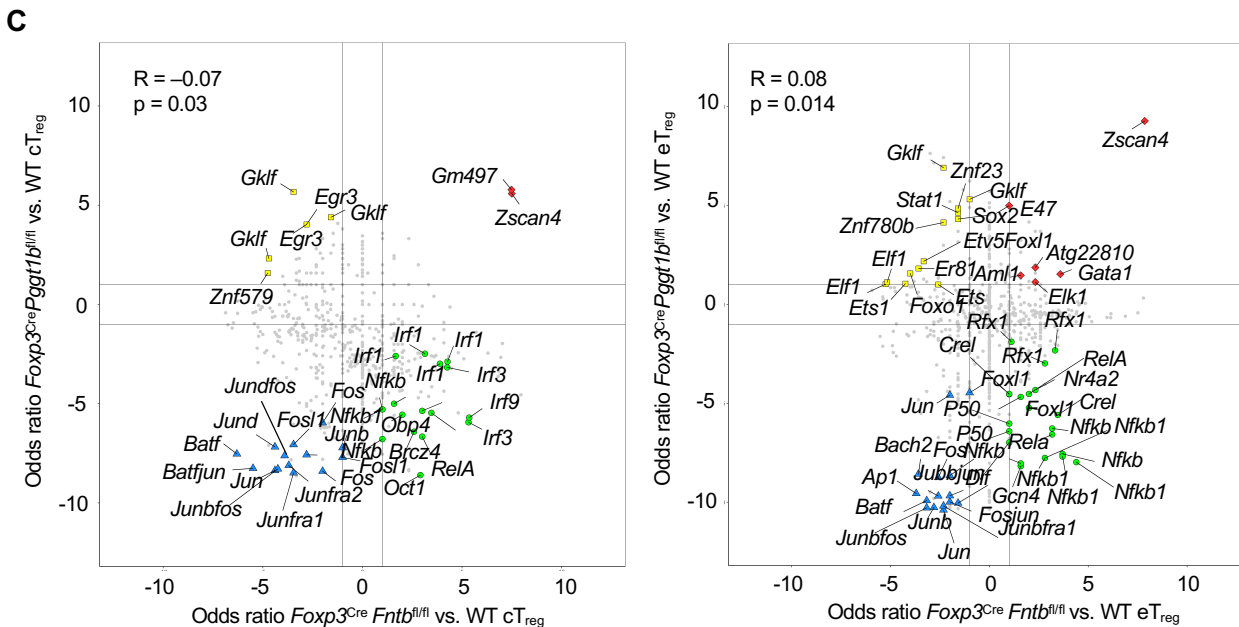

**Figure S6. ATAC-Seq analysis reveals enrichment of Jun transcriptional programming in eT<sub>reg</sub> cells.**

**Related to Figure 6.**

(A) Ranking of downregulation of AP-1 family, NF- $\kappa$ B and NFATc1 transcription factors [ranked based on FDR < 0.0001 and odds ratio (*Foxp3<sup>Cre</sup>Pggt1b<sup>fl/fl</sup>* vs. WT eT<sub>reg</sub> cells) < 1] as predicted from motif enrichment analysis of ATAC-Seq data. (B) ATAC-Seq analysis was performed for WT cT<sub>reg</sub> and eT<sub>reg</sub> cells from mixed bone marrow chimeras. Footprinting analysis revealed binding profiles of transcription factors from Jun family are enriched in eT<sub>reg</sub> cells compared to cT<sub>reg</sub> cells. (C) Odds ratio/odds ratio plot indicated the predicted motifs in *Foxp3<sup>Cre</sup>Pggt1b<sup>fl/fl</sup>* vs. WT cT<sub>reg</sub> cells compared with *Foxp3<sup>Cre</sup>Fntb<sup>fl/fl</sup>* vs. WT cT<sub>reg</sub> cells (left), or *Foxp3<sup>Cre</sup>Pggt1b<sup>fl/fl</sup>* vs. WT eT<sub>reg</sub> cells compared with *Foxp3<sup>Cre</sup>Fntb<sup>fl/fl</sup>* vs. WT eT<sub>reg</sub> cells (right).

**Figure S7**

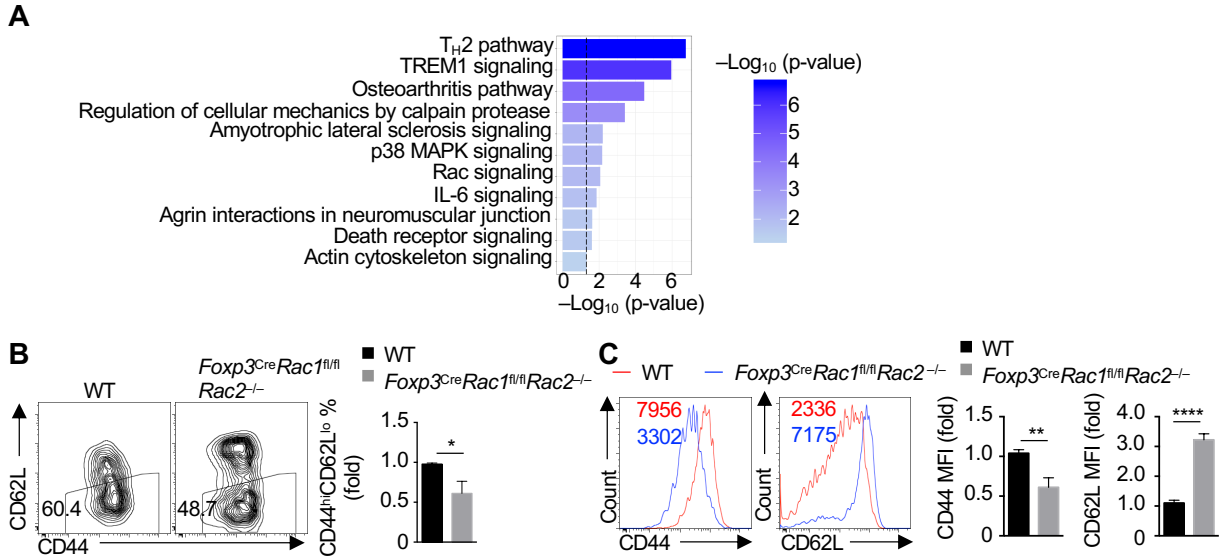

**Figure S7. Rac promotes eT<sub>reg</sub>-like cell generation. Related to Figure 7.**

(A) Ingenuity pathway analysis of predicted downregulated pathways in transcriptomes of *Foxp3<sup>Cre</sup>Pgg1b<sup>fl/fl</sup>* T<sub>reg</sub> cells compared to WT T<sub>reg</sub> cells. (B and C) cT<sub>reg</sub> cells were isolated from WT and *Foxp3<sup>Cre</sup>Rac1<sup>fl/fl</sup>Rac2<sup>-/-</sup>* mice and activated by anti-CD3/28 plus IL-2 for 3 days. Flow cytometry analysis and quantification of the percentage of eT<sub>reg</sub>-like cells (B) and expression of CD44 and CD62L (C). Data are compiled from three (B, C) independent experiments, with 3–5 (B, C) mice per group. Numbers indicate percentage of cells in gates. Numbers in histograms indicate mean fluorescence intensity of proteins.
